# Supplementary material
Source: Springer Nature journal article supplement (https://www.springermedizin.de/resource/supplementary/12914_2005_28_MOESM3_ESM.pdf/9537364)
Supplement: MOESM3 [file 9537364]

100%  
90%  
80%  
70%  
60%  
50%  
40%  
30%  
20%  
10%  
0%

Inappropriate care seeking

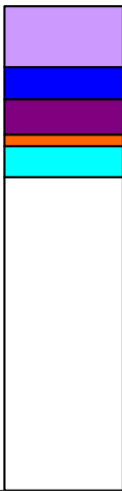

Appropriate care seeking

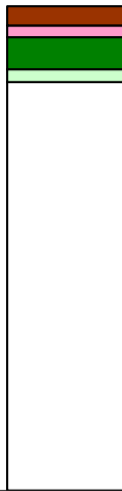

- Child was crying excessively
- Since the hospital was nearby
- Illness may get worse
- Better treatment
- Thought the illness was not serious
- No money see doctor so went to pharmacy
- Because the pharmacy was nearby
- Thought the child had mild illness
- Tried home remedies due to various reasons
- Thought the child had serious illness
